# Supplementary material
Source: ML conference proceedings conference paper supplement (https://openreview.net/forum?id=rxLUTPLBT3)

Ground Truth Vector Field Predicted Vector Field with Uncertainty - Incorrect Equivariant Model (MSE:

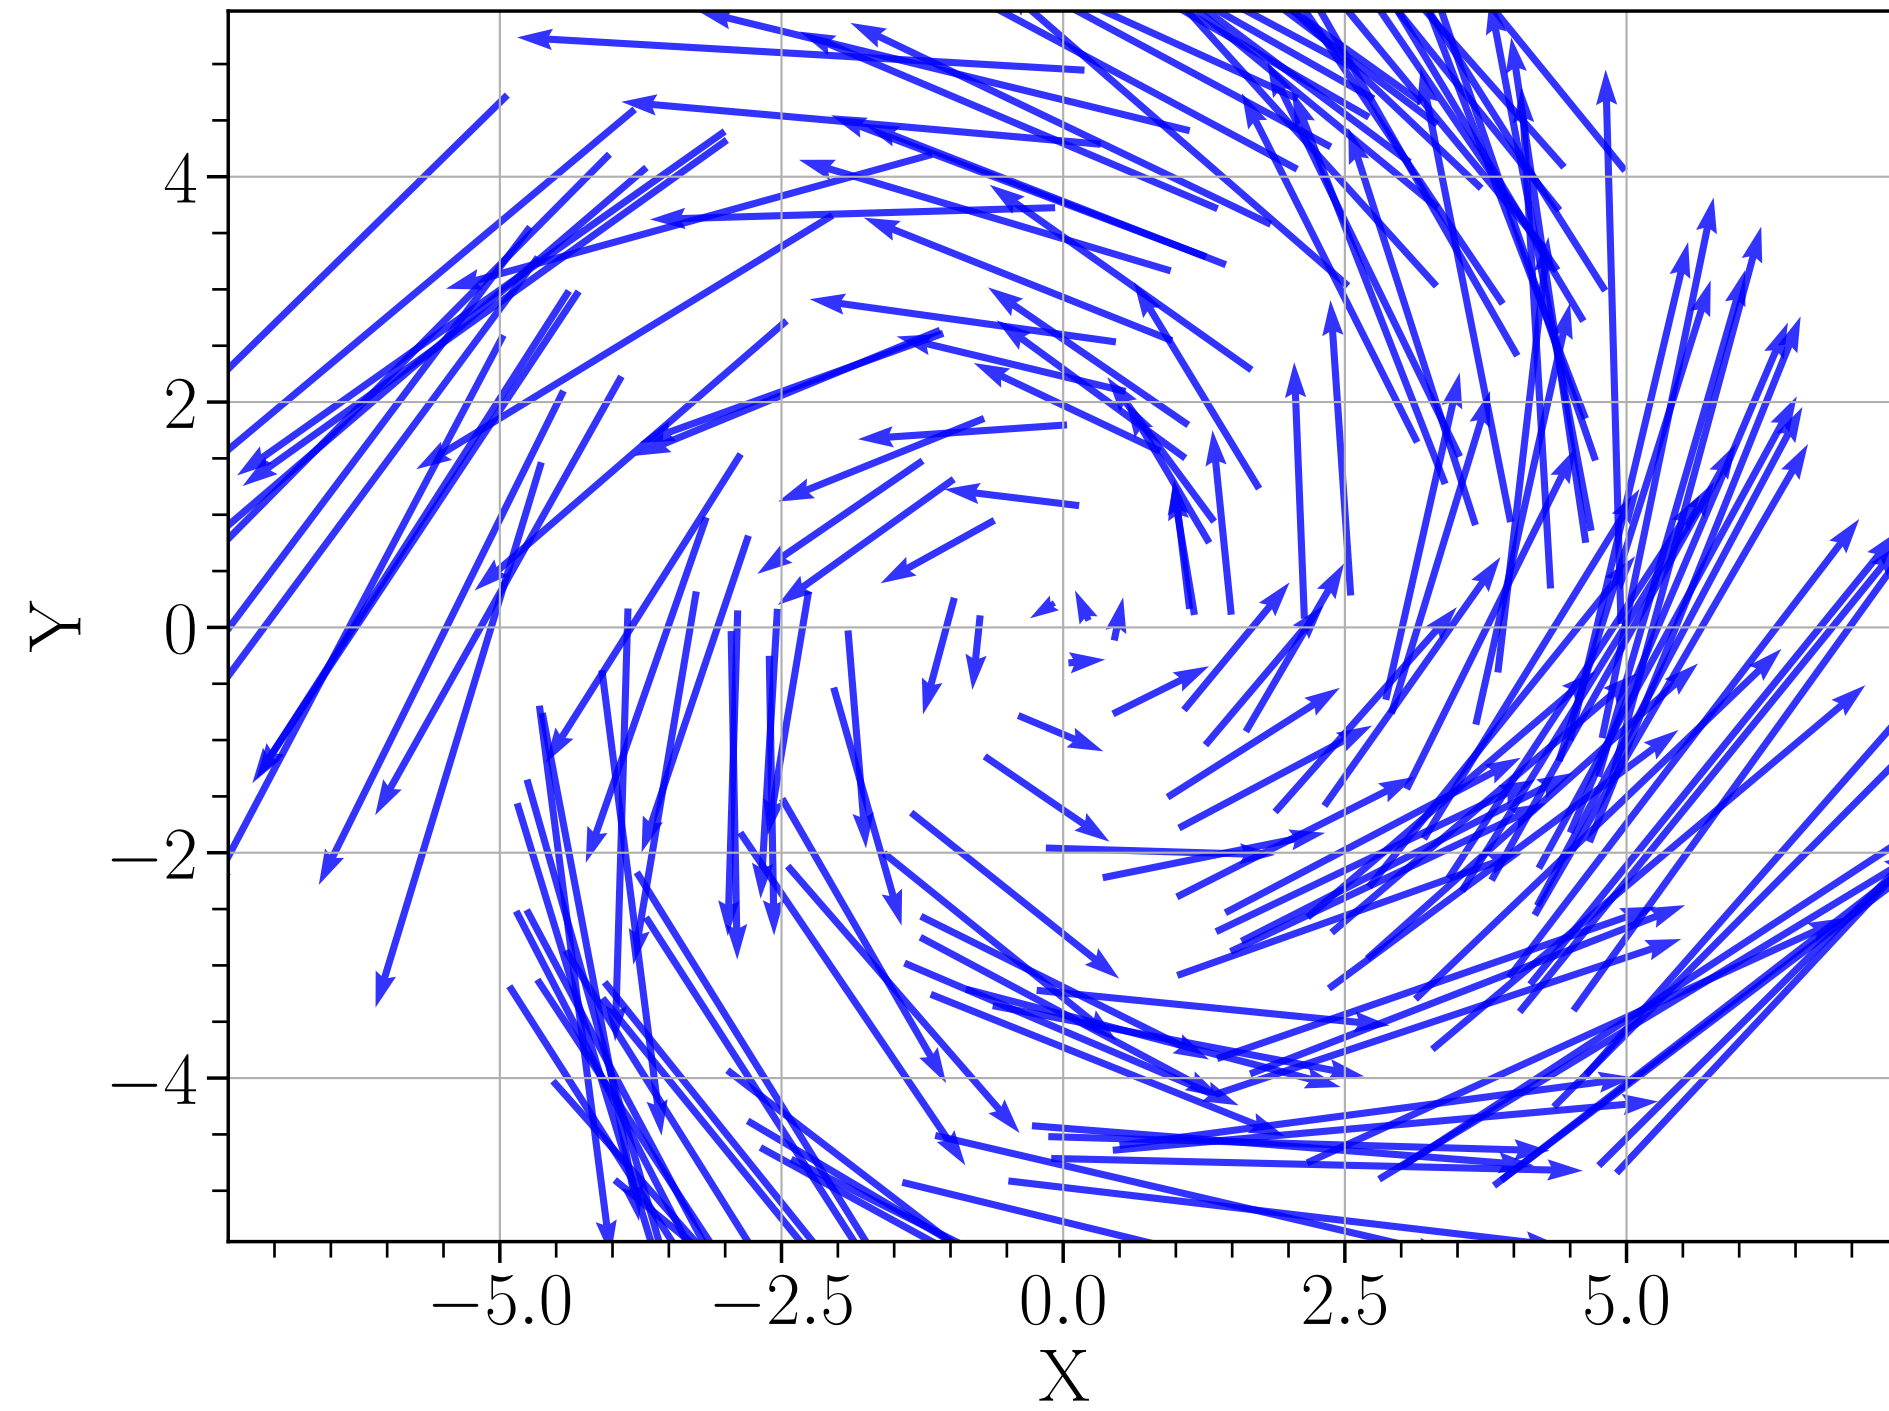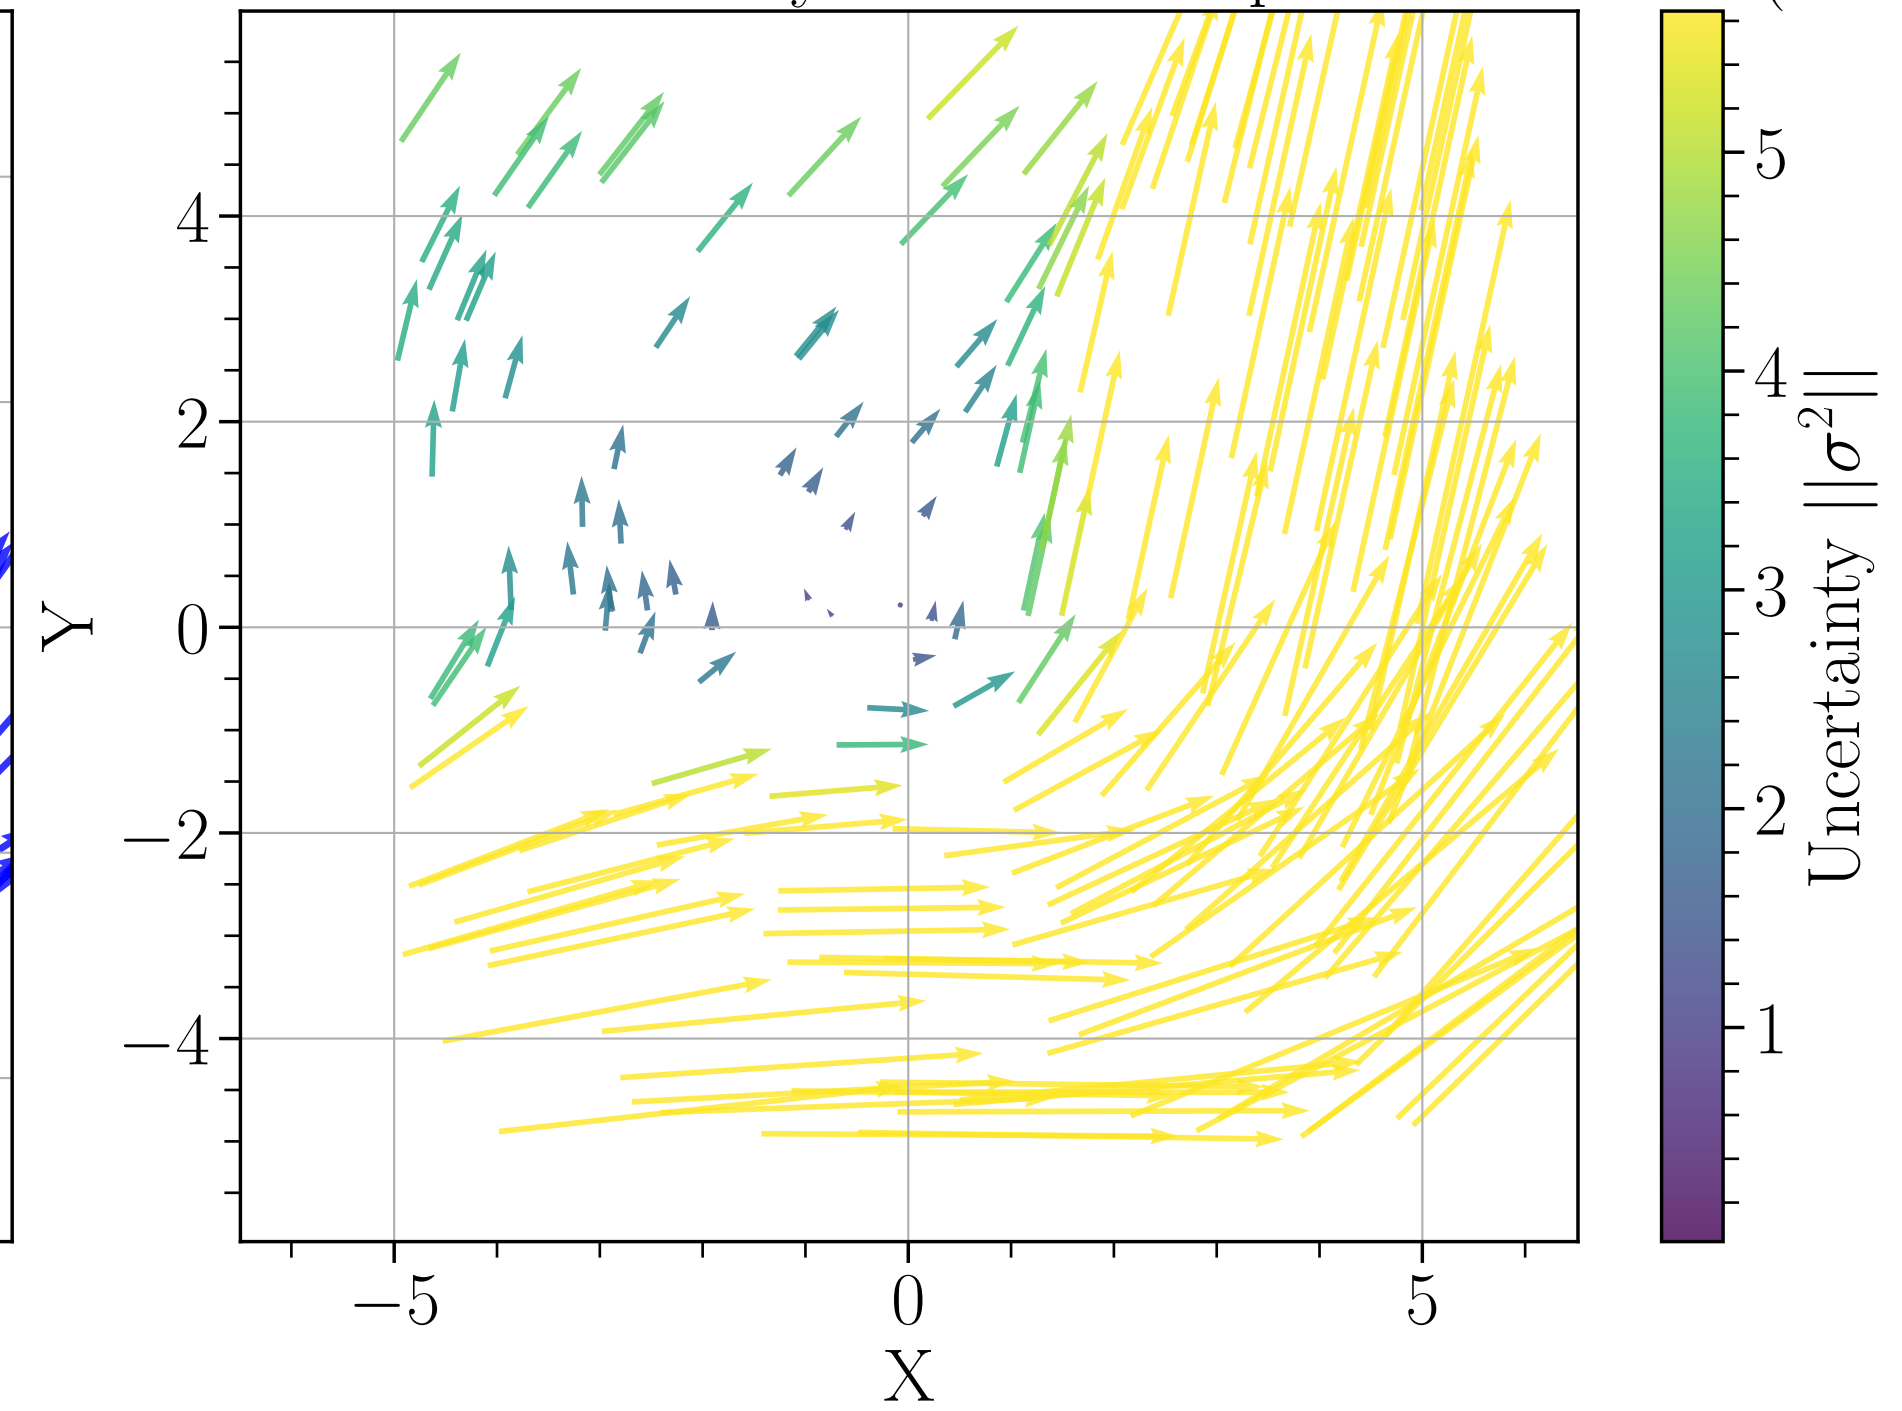

Supplement: supplementary_material [file incorrect_equivariant_predictions.pdf › equiUQ/results/vector_field/incorrect_equivariant_predictions.pdf]
