# Supplementary material
Source: ML conference proceedings conference paper supplement (https://openreview.net/forum?id=rxLUTPLBT3)

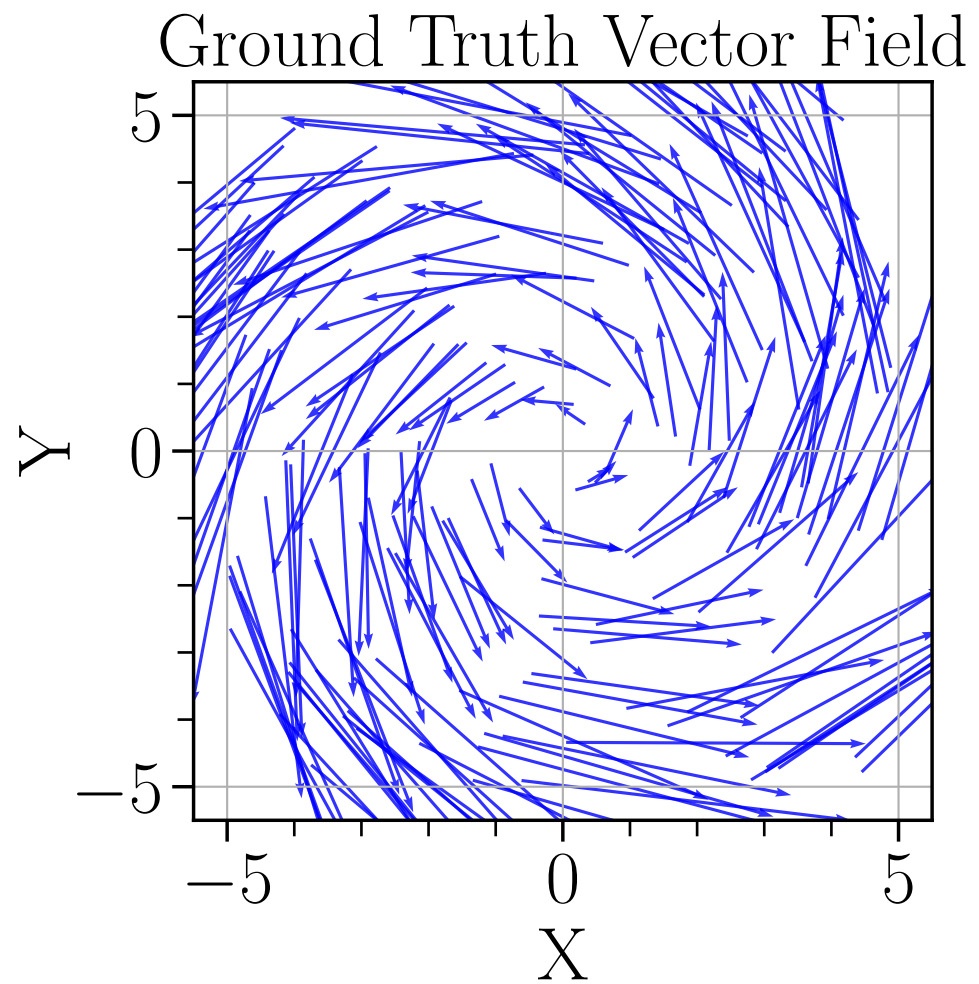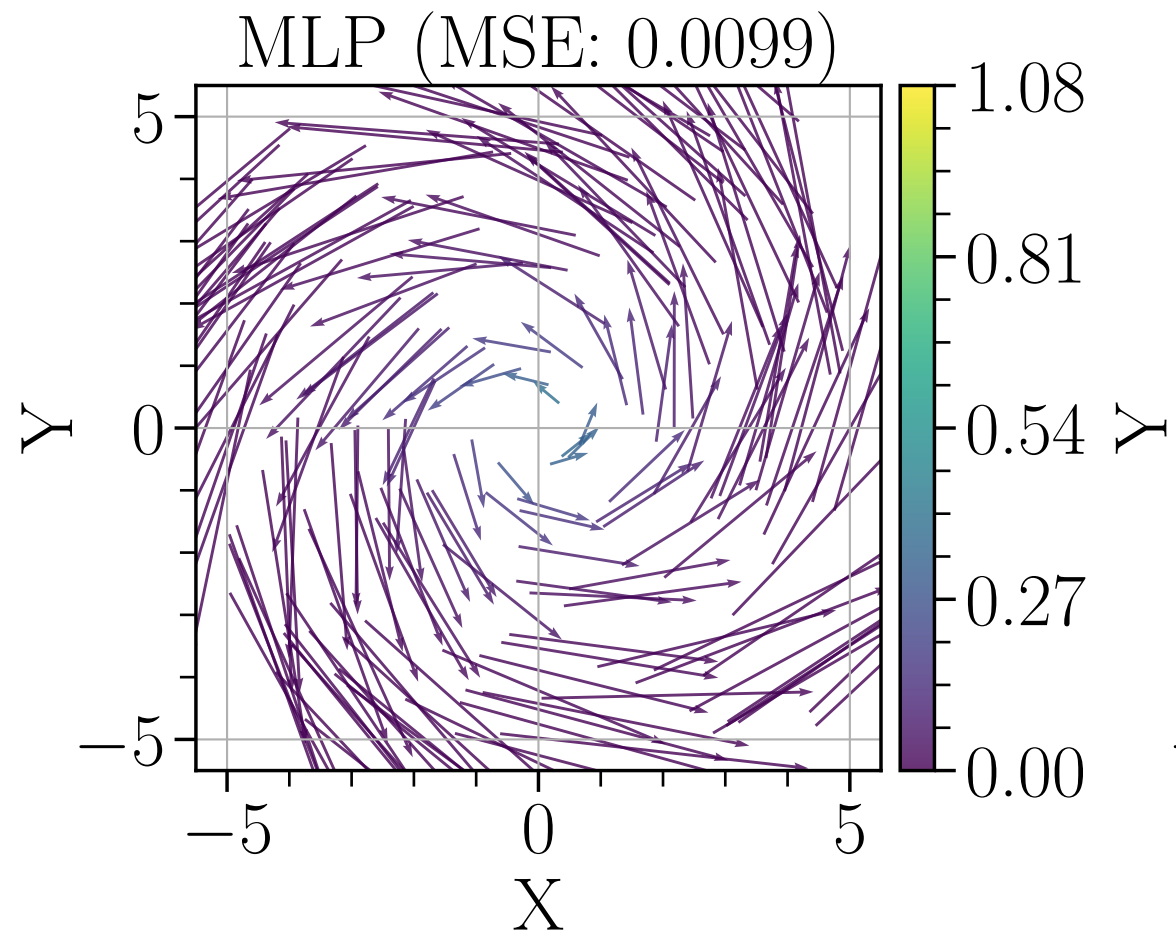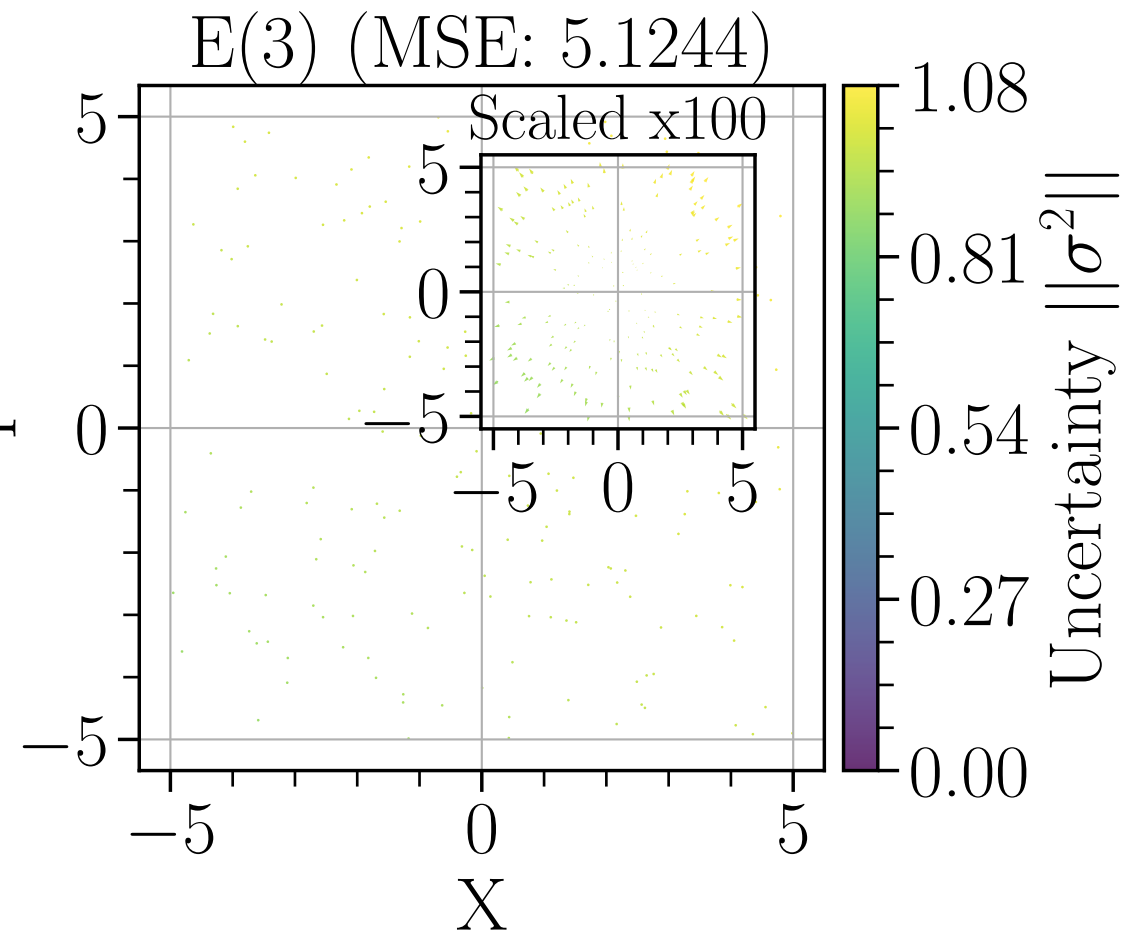

Supplement: supplementary_material [file all_model_predictions_comparison.pdf › equiUQ/results/vector_field/all_model_predictions_comparison.pdf]

Error vs. Predicted Uncertainty

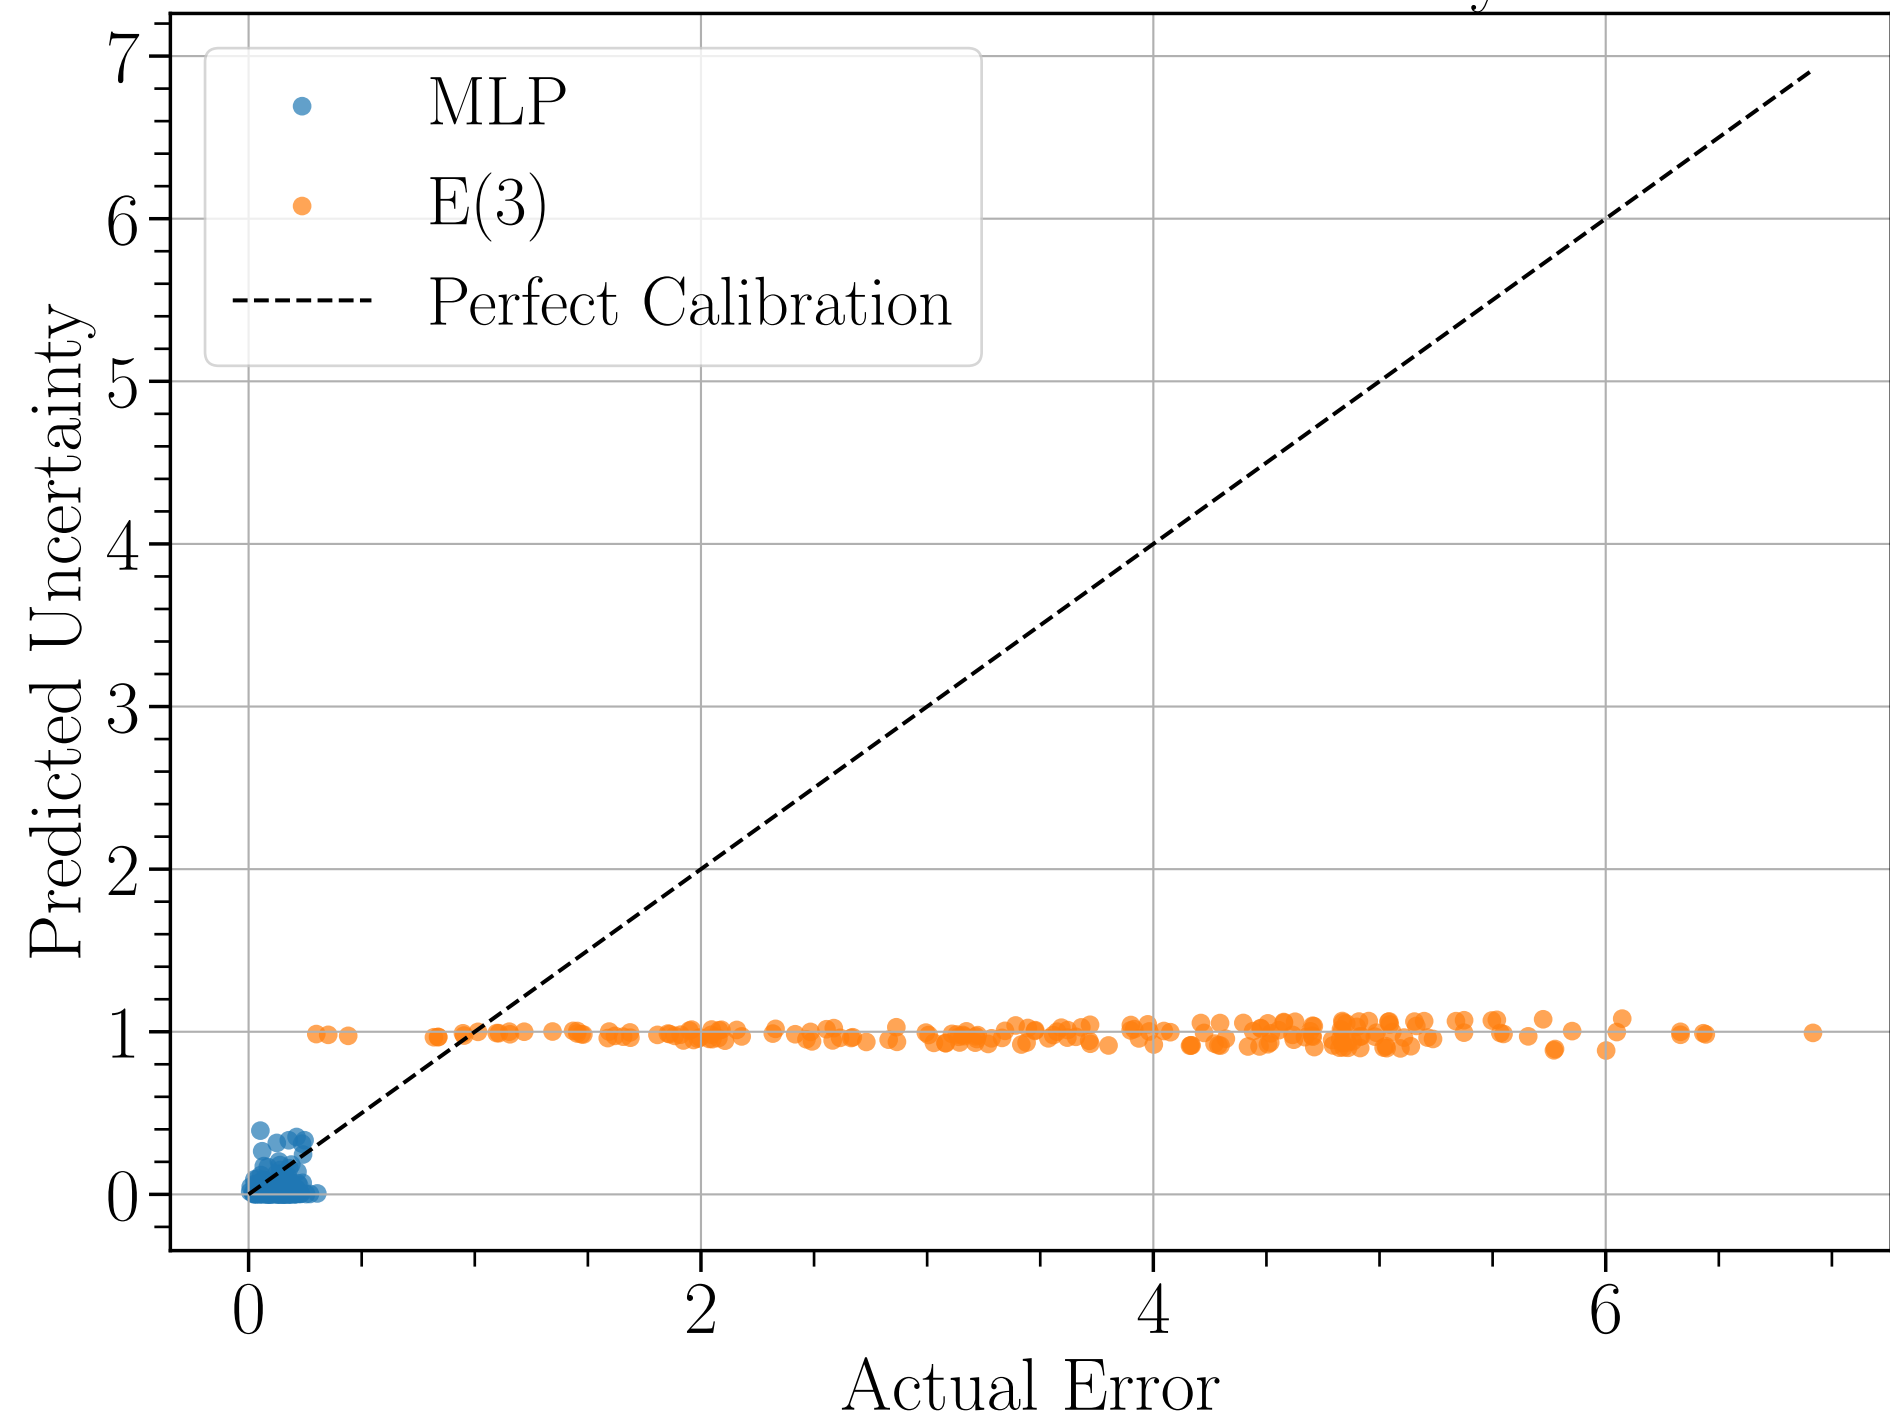

Supplement: supplementary_material [file all_model_predictions_comparison_error_comparison.pdf › equiUQ/results/vector_field/all_model_predictions_comparison_error_comparison.pdf]

Ground Truth Vector Field

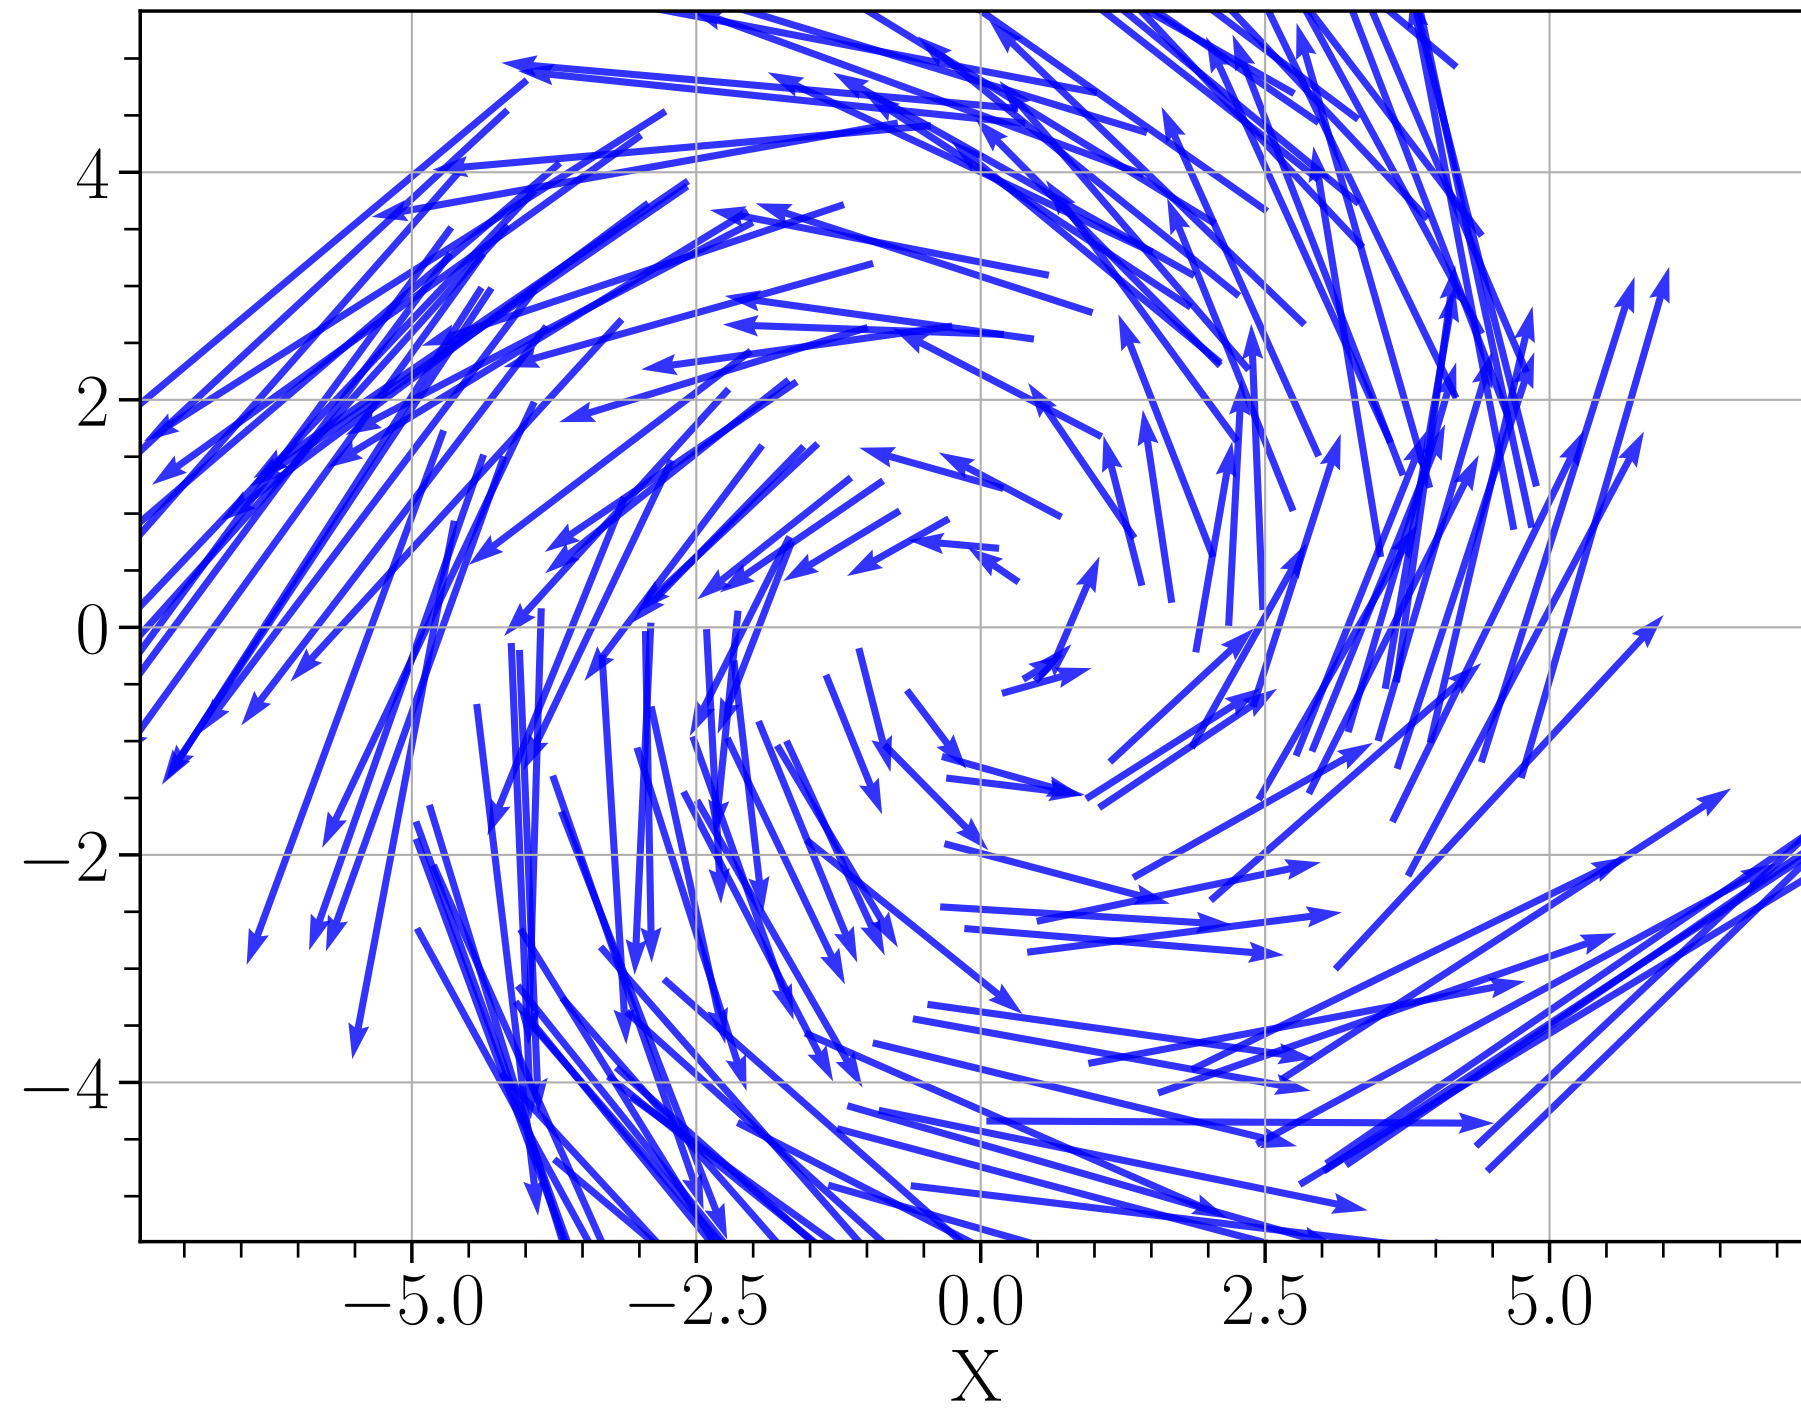

Predicted Vector Field with Uncertainty - MLP Model (MSE: 0.0099)

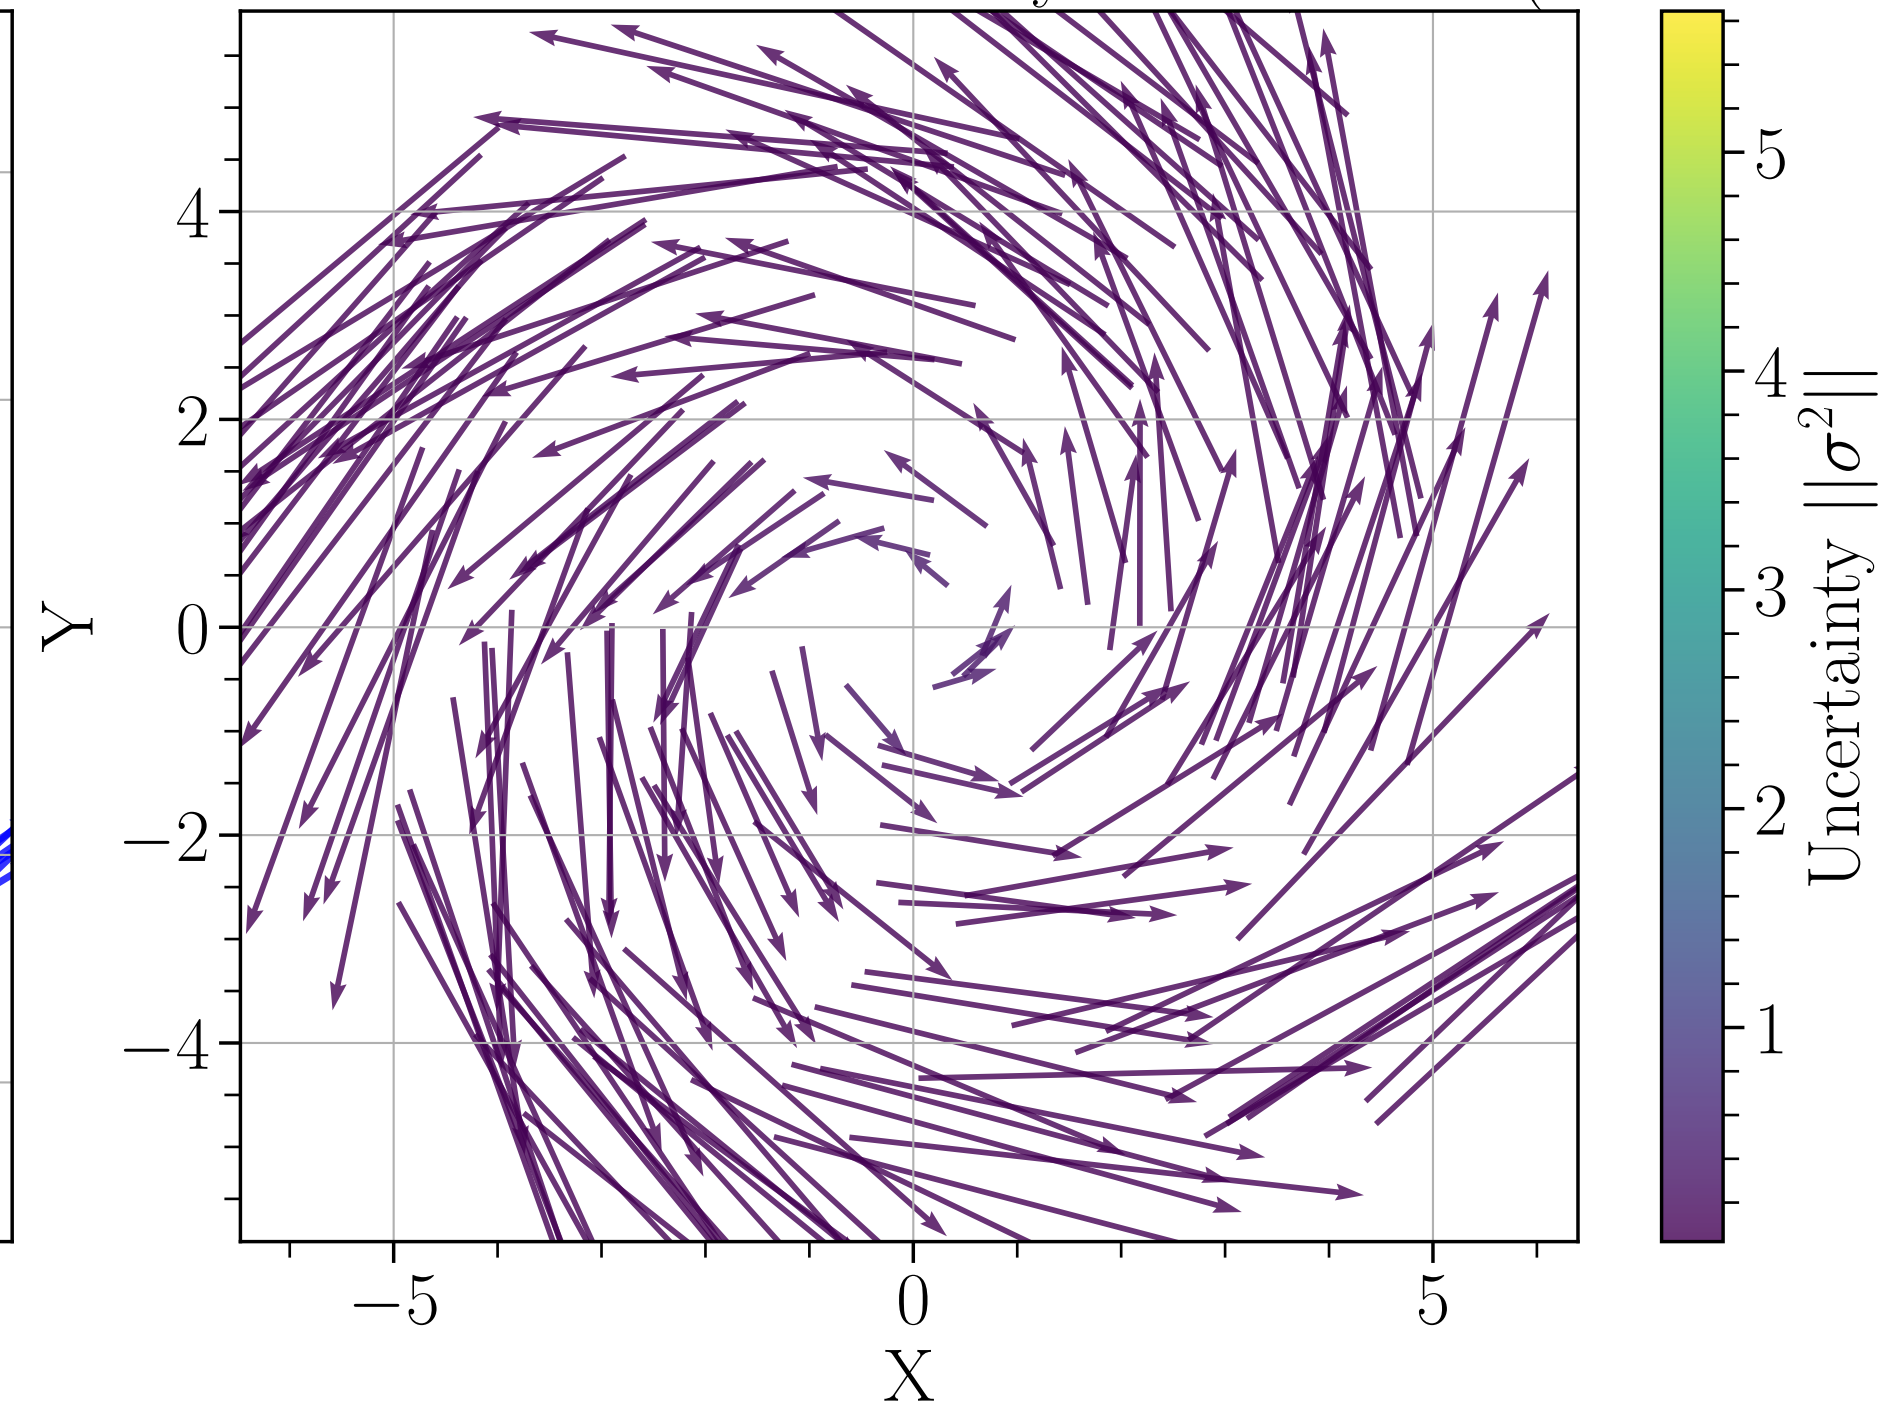

Supplement: supplementary_material [file mlp_predictions.pdf › equiUQ/results/vector_field/mlp_predictions.pdf]
